# Supplementary material
Source: publisher figshare collection journal article supplement (https://future-science-group.figshare.com/ndownloader/files/30702983)
Supplement: Supplementary file 1 [file 30702983]

# Supplementary Table 1. Assessment of GvHD – standard GvHD scoring protocol [18].

| **Criteria** | **Grade 0** | **Grade 1** | **Grade 2** |
| --- | --- | --- | --- |
| Weight loss | <10% | >10% to <25% | >25% |
| Posture | Normal | Hunching noted only at rest | Severe gait, impaired movement |
| Activity | Normal | Mild to moderately decreased | Stationary until stimulated |
| Fur texture | Normal | Mild to moderate ruffling | Severe ruffling and/or poor grooming |
| Skin integrity | Normal | Scaling of paws and/or tail | Obvious areas of denuded skin |

GvHD: graft-versus-host disease.
